# Supplementary material for: Megalencephalic leukoencephalopathy with subcortical cysts is a developmental disorder of the gliovascular unit
Source: eLife. 2021 Nov 1;10:e71379. doi: 10.7554/eLife.71379 (PMC8598235; doi:10.7554/eLife.71379)
Supplement: Figure 1—figure supplement 1—source data 1. [file elife-71379-fig1-figsupp1-data1.xlsx]

## Sheet: Feuil1
Volumetry
	WT						Mlc1 KO						Two-tailed Student’s T test		Corresponding Figure
	Min	1st quartile	Median	3rd quartile	Max	N	Min	1st quartile	Median	3rd quartile	Max	N	P-value	Significance
Brain volume (mm3)	423.395	443.204	452.312	468.641	483.121	7	482.753	493.933	505.093	511.199	545.458	7	0.0001	***	1C,D-supplement 1
Relative ventricular volume (%)	1.57138	1.88969	2.01285	2.11069	2.87492	7	1.13348	1.72018	1.95766	2.10024	2.83544	7	0.1975	ns
Apparent diffusion coefficient (mm2.s-1)
Zone	WT						Mlc1 KO						Two-tailed Student’s T test		Corresponding Figure
	Min	1st quartile	Median	3rd quartile	Max	N	Min	1st quartile	Median	3rd quartile	Max	N	P-value	Significance
Midbrain	0.000777	0.000882	0.000918	0.000951	0.000999	7	0.000882	0.000972	0.001008	0.001032	0.00105	7	0.0002265	***	1E,G-supplement 1
Septal Area	0.000825	0.000918	0.000981	0.001074	0.001197	7	0.000897	0.001062	0.001098	0.001131	0.001275	7	0.02095	*
Thalamus	0.000804	0.000906	0.000939	0.00096	0.000984	7	0.000861	0.000969	0.001002	0.001038	0.001071	7	0.001064	**
