# Supplementary material for: Megalencephalic leukoencephalopathy with subcortical cysts is a developmental disorder of the gliovascular unit
Source: eLife. 2021 Nov 1;10:e71379. doi: 10.7554/eLife.71379 (PMC8598235; doi:10.7554/eLife.71379)
Supplement: Figure 1—source data 1. [file elife-71379-fig1-data1.xlsx]

## Sheet: Feuil1
Endothelial cells (a.u.)
Gene name	Stage	WT						Mlc1 KO						Two-tailed Mann-Whitney test		Corresponding Figure
		Min	1st quartile	Median	3rd quartile	Max	N	Min	1st quartile	Median	3rd quartile	Max	N	P-value	Significance
Abcb1	P5	0.14	0.23	0.86	1.72	2.13	5	0.22	0.33	0.58	1.28	1.57	5	>0.9999	ns	1A
	P15	10.38	11.16	13.54	15.42	16.03	4	6.64	6.73	7.09	10.3	11.34	4	0.0571	ns
	P60	11.15	11.63	15.6	19.17	19.18	5	8.89	8.89	11.79	13.06	13.06	3	0.25	ns
Cldn5	P5	2.38	3.01	5.95	7.96	8.28	4	6.25	7.1	10.14	13.49	14.45	4	0.1143	ns
	P15	30.35	31.25	40.3	77.66	88	4	30.88	35.51	39.64	55.94	60.62	4	>0.9999	ns
	P60	8.61	9.35	13.825	19.16	20.18	4	11.58	11.65	16.98	27.16	28.85	4	0.3429	ns
Endothelial cells (purified microvessels) (a.u.)
Protein name	Stage	WT						Mlc1 KO						Two-tailed Mann-Whitney test		Corresponding Figure
		Min	1st quartile	Median	3rd quartile	Max	N	Min	1st quartile	Median	3rd quartile	Max	N	P-value	Significance
P-glycoprotein	P5	0.397251	0.554751	0.578906	0.699024	0.912451	5	0.296052	0.423644	0.473529	0.485873	0.50084	4	0.1111	ns	1B
	P15	0.456981	0.467883	0.706376	0.746561	1.01073	5	0.261641	0.286373	0.332789	0.341089	1.01731	5	0.1508	ns
	P60	0.351701	0.570328	0.865459	0.875632	1.264	5	0.682177	0.702855	0.774752	0.969258	1.08734	5	0.8413	ns
Claudin5	P5	0.255965	0.490323	0.588095	0.729412	0.85388	5	0.490419	0.538643	0.591841	0.633007	0.788218	5	0.8413	ns
	P15	0.80466	0.892113	0.893799	1.03169	1.11385	5	0.21992	0.405488	0.501431	0.649709	0.99228	4	0.1111	ns
	P60	1.15615	1.26669	1.37406	1.41384	1.50596	5	1.05452	1.2247	1.32031	1.38115	1.54409	5	0.8413	ns
Apparent diffusion coefficient (mm2.s-1)
Zone	WT						Mlc1 KO						Two-tailed Student’s T test
	Min	1st quartile	Median	3rd quartile	Max	N	Min	1st quartile	Median	3rd quartile	Max	N	P-value	Significance	Corresponding Figure
Cortex	0.00078	0.000867	0.0009	0.000915	0.000984	7	0.000876	0.000969	0.001008	0.001026	0.001068	7	0.0001	***	1C
Blood brain barrier permeability (μL/g)
	WT						Mlc1 KO						Two-tailed Mann-Whitney test		Corresponding Figure
	Min	1st quartile	Median	3rd quartile	Max	N	Min	1st quartile	Median	3rd quartile	Max	N	P-value	Significance
- Albumin	10	14.18	16.75	18.73	24.5	8	9.2	14.35	15.7	18.6	26.5	9	0.9824	ns	1D
+ Albumin	12	13.4	14.8	18	22.4	11	10	12.15	13.95	19.38	30	12	0.4399	ns
Endothelial cells
Pecam-1		WT						Mlc1 KO						One-tailed Mann-Whitney test		Corresponding Figure
		Min	1st quartile	Median	3rd quartile	Max	N	Min	1st quartile	Median	3rd quartile	Max	N	P-value	Significance
Parenchymal	length ratio (μm-2)	1.7164e-05	1.99601e-05	2.27561e-05	2.34316e-05	2.41071e-05	3	1.38706e-05	1.65805e-05	1.92904e-05	0.000192285	0.00036528	3	0.35	ns	1E F
	branching ratio (μm-3)	2.7949e-05	3.2284e-05	3.6619e-05	3.9037e-05	4.1455e-05	3	2.2932e-05	2.74495e-05	3.1967e-05	4.54515e-05	5.8936e-05	3	0.5	ns
	straightness (a.u.)	0.94	0.945	0.95	0.95	0.95	3	0.94	0.94	0.94	0.95	0.96	3	0.5	ns
Cortical surface	length ratio (μm-1)	9.1727e-05	0.000106714	0.0001217	0.000189715	0.00025773	3	5.5165e-05	8.75975e-05	0.00012003	0.000122655	0.00012528	3	0.35	ns
	branching ratio (μm-2)	1.3275e-06	1.9546e-06	2.5817e-06	4.01765e-06	5.4536e-06	3	5.9592e-07	1.51246e-06	2.429e-06	2.5004e-06	2.5718e-06	3	0.2	ns
	straightness (a.u.)	0.92	0.925	0.93	0.935	0.94	3	0.93	0.935	0.94	0.945	0.95	3	0.25	ns
