# Supplementary material for: Megalencephalic leukoencephalopathy with subcortical cysts is a developmental disorder of the gliovascular unit
Source: eLife. 2021 Nov 1;10:e71379. doi: 10.7554/eLife.71379 (PMC8598235; doi:10.7554/eLife.71379)
Supplement: Figure 2—source data 1. [file elife-71379-fig2-data1.xlsx]

## Sheet: Feuil1
Vascular smooth muscle cells (a.u.)
Gene name	Stage	WT						Mlc1 KO						Two-tailed Mann-Whitney test		Corresponding Figure
		Min	1st quartile	Median	3rd quartile	Max	N	Min	1st quartile	Median	3rd quartile	Max	N	P-value	Significance
Acta2	P5	7.89	8.64	9.85	10.11	10.2	5	0.25	0.55	1.41	1.52	1.53	5	0.0079	**	2A
	P15	18.95	20.15	26.435	29.37	30.12	4	5.04	6.22	9.775	14.35	15.86	4	0.0286	*
	P60	4.86	4.94	5.02	6.35	7.68	3	4.18	7.31	10.44	12.815	15.19	3	0.7	ns
Atp1b1	P5	0.33	0.3375	0.35	0.395	0.5	4	0.08	0.14	0.32	0.39	0.46	5	0.4127	ns
	P15	0.19	0.2875	0.345	0.4225	0.58	4	0.4	0.5125	0.61	0.6775	0.7	4	0.1143	ns
	P60	0.25	0.28	0.3	0.31	1.11	5	0.15	0.23	0.26	0.32	0.46	5	0.5476	ns
Vascular smooth muscle cells (purified microvessels) (a.u.)
Protein name	Stage	WT						Mlc1 KO						Two-tailed Mann-Whitney test		Corresponding Figure
		Min	1st quartile	Median	3rd quartile	Max	N	Min	1st quartile	Median	3rd quartile	Max	N	P-value	Significance
Smooth muscle actin	P5	0.115491	0.140371	0.205687	0.377192	0.797691	5	0.161872	0.203418	0.46351	0.652493	1.90228	5	0.4206	ns	2B
	P15	0.957423	1.06636	1.06795	1.11877	1.27901	5	0.414733	0.749404	0.991494	0.995907	1.10588	5	0.1508	ns
	P60	1.15179	1.16011	1.20262	1.37626	1.77799	4	0.694715	0.969798	1.03604	1.05257	1.14882	5	0.0159	*
Vascular smooth muscle cells
Smooth muscle actin		WT						Mlc1 KO						One-tailed Mann-Whitney test		Corresponding Figure
		Min	1st quartile	Median	3rd quartile	Max	N	Min	1st quartile	Median	3rd quartile	Max	N	P-value	Significance
Parenchymal	length ratio (μm-2)	1.63e-05	2e-05	2.37e-05	2.43e-05	2.49e-05	3	1.86e-05	2.52e-05	3.18e-05	4.93498e-05	6.68995e-05	3	0.2	ns	2C,D
	branching ratio (μm-3)	1.85e-07	2.65e-07	3.45e-07	3.45e-07	3.45e-07	3	2.75e-07	3.15e-07	3.55e-07	6.06159e-07	8.57317e-07	3	0.2	ns
	straightness (a.u.)	0.91241	0.92288	0.933349	0.933735	0.93412	3	0.894966	0.913417	0.931869	0.948547	0.965225	3	0.5	ns
Cortical surface	length ratio (μm-1)	0.00163485	0.00183371	0.001905	0.00196775	0.002141	4	0.000766	0.00112525	0.0014715	0.0017608	0.0019492	4	0.1714	ns
	branching ratio (μm-2)	7.48e-06	8.695e-06	1.555e-05	2.33367e-05	2.73468e-05	4	5.21e-06	5.735e-06	8.705e-06	1.4375e-05	2.3e-05	4	0.2429	ns
	straightness (a.u.)	0.899227	0.911439	0.916035	0.919095	0.926701	4	0.906855	0.911169	0.916303	0.922607	0.930427	4	0.4429	ns
	anastomosis (μm-2)	2.1e-07	2.278e-07	2.80367e-07	3.7025e-07	5e-07	4	1.14419e-07	1.77105e-07	2.8e-07	3.74845e-07	4.1338e-07	4	0.3429	ns
