# Supplementary material for: Megalencephalic leukoencephalopathy with subcortical cysts is a developmental disorder of the gliovascular unit
Source: eLife. 2021 Nov 1;10:e71379. doi: 10.7554/eLife.71379 (PMC8598235; doi:10.7554/eLife.71379)
Supplement: Figure 3—source data 1. [file elife-71379-fig3-data1.xlsx]

## Sheet: Feuil1
Amplitude (%.min-1)
	WT						Mlc1 KO						Two-tailed Mann-Whitney test		Corresponding Figure
	Min	1st quartile	Median	3rd quartile	Max	N	Min	1st quartile	Median	3rd quartile	Max	N	P-value	Significance
P5	-0.377299	3.13264	4.5512	8.14486	16.7787	13	-0.844773	1.07822	2.35364	3.33187	5.96659	13	0.0501	ns	3B, C
P10	3.72712	8.58628	13.6543	16.7399	29.0741	9	1.45304	3.69897	5.26111	9.50814	11.8681	12	0.0073	**
P15	3.5543	11.9591	14.5775	10.7493	48.0573	8	-0.627892	9.86783	12.2614	13.3678	24.4208	11	0.0091	**
Slope (%)
	WT						Mlc1 KO						Two-tailed Mann-Whitney test		Corresponding Figure
	Min	1st quartile	Median	3rd quartile	Max	N	Min	1st quartile	Median	3rd quartile	Max	N	P-value	Significance
P5	-3.95472	-1.30253	-0.717214	-0.31167	0.271541	13	-1.74658	-0.718712	-0.502019	-0.198815	0.739479	13	0.2035	ns	3B, C
P10	-3.04293	-2.64796	-1.0536	-1.01409	-0.284375	9	-2.03483	-1.3973	-1.14984	-0.610784	-0.35422	12	0.0339	*
P15	-5.31697	-3.64436	-3.39465	-2.79455	-0.417942	8	-4.13192	-2.99798	-2.02209	-0.528926	0.067596	11	0.0067	**
Microbubbles Ultrafast Ultrasound - arterial diameter (μm)
WT						Mlc1 KO						Two-tailed Mann-Whitney test		Corresponding Figure
Min	1st quartile	Median	3rd quartile	Max	N	Min	1st quartile	Median	3rd quartile	Max	N	P-value	Significance
36.1755	37.3438	38.2953	38.8265	44.1768	6	29.67	31.306	32.0682	33.4972	33.8941	6	0.0022	**	3D
Fonctionnal Ultrafast Ultrasound - % of Power Doppler increase
WT						Mlc1 KO						Two-tailed Mann-Whitney test		Corresponding Figure
Min	1st quartile	Median	3rd quartile	Max	N	Min	1st quartile	Median	3rd quartile	Max	N	P-value	Significance
5.21957	5.96395	7.46058	8.09687	13.8406	11	2.28478	2.61477	3.86245	5.32782	10.3551	12	0.0028	**	3E
