# Supplementary material for: Megalencephalic leukoencephalopathy with subcortical cysts is a developmental disorder of the gliovascular unit
Source: eLife. 2021 Nov 1;10:e71379. doi: 10.7554/eLife.71379 (PMC8598235; doi:10.7554/eLife.71379)
Supplement: Figure 4—source data 1. [file elife-71379-fig4-data1.xlsx]

## Sheet: Feuil1
Astrocytes (whole brain) (a.u.)
Protein name	Stage	WT						Mlc1 KO						Two-tailed Mann-Whitney test		Corresponding Figure
		Min	1st quartile	Median	3rd quartile	Max	N	Min	1st quartile	Median	3rd quartile	Max	N	P-value	Significance
GlialCAM	P5	0.95	0.99	1	1.02	1.05	5	0.52	0.67	0.7	0.73	0.83	5	0.0079	**	4B
	P15	0.35	0.58	0.96	1.1	2.01	5	0.17	0.29	0.72	0.84	1.62	5	0.4206	ns
	P60	0.54	0.77	1	1.18	1.5	5	0.48	0.61	0.9	0.95	1.1	5	0.4206	ns
Aquaporin 4	P5	0.77	0.93	1	1.06	1.23	5	0.12	0.24	0.39	0.44	0.46	5	0.0079	**
	P15	0.47	0.84	0.89	1.31	1.49	5	0.72	0.8	0.88	0.92	0.98	5	0.6905	ns
	P60	0.79	0.84	1.03	1.06	1.28	5	0.61	1.14	1.18	1.26	1.39	5	0.4206	ns
Connexin 43	P5	0.81	0.96	0.99	1.01	1.21	5	0.37	0.42	0.64	0.68	0.87	5	0.0159	*
	P15	0.64	0.83	0.96	1.27	1.31	5	0.19	1.23	1.3	1.49	4.9	5	0.4206	ns
	P60	0.66	0.92	0.96	1.2	1.26	5	0.63	1.48	1.58	1.98	2.1	5	0.1508	ns
Kir4.1	P15	0.84	0.85	0.88	0.9	1.41	5	0.62	0.67	0.7	0.72	0.75	5	0.0079	**
	P60	0.81	0.83	0.91	1.22	1.22	5	0.49	0.57	0.63	0.75	0.78	5	0.0079	**
STED data
		WT						Mlc1 KO						Two-tailed Mann-Whitney test		Corresponding Figure
		Min	1st quartile	Median	3rd quartile	Max	N	Min	1st quartile	Median	3rd quartile	Max	N	P-value	Significance
Aquaporin 4	Aquaporin 4 density/Isolectin B4 density	0.9167	0.9596	1.046	1.082	1.155	18	0.8968	0.9641	1.04	1.1	1.163	18	0.9129	ns	4C
Connexin 43	mean puncta area (µm2)	0	0.0011	0.021	0.034	0.0635	15	0.012	0.025	0.03	0.133	0.668	15	0.0268	*
	puncta number/perimeter (µm-1)	0	0.0091	0.0281	0.05089	0.07443		0.02462	0.06789	0.1001	0.169	0.2863		<0,0001	***
GlialCAM	mean puncta area (µm2)	0.033	0.04456	0.1004	0.1437	0.2133	14	0.0012	0.069	0.1195	0.1466	0.2132	14	0.5357	ns
	puncta number/perimeter (µm-1)	0.003	0.09622	0.1659	0.4736	0.817		0	0.00012	0.003703	0.1855	0.4741		0.0135	*
Kir4.1	mean puncta area (µm2)	0.011	0.0225	0.03	0.06429	0.154	17	0.014	0.02511	0.03585	0.07504	0.1663	18	0.5191	ns
	puncta number/perimeter (µm-1)	0.6289	0.7315	0.8369	1.133	1.653		0.007407	0.4423	0.5878	0.7133	1.37		0.0011	**
