# Supplementary material for: Megalencephalic leukoencephalopathy with subcortical cysts is a developmental disorder of the gliovascular unit
Source: eLife. 2021 Nov 1;10:e71379. doi: 10.7554/eLife.71379 (PMC8598235; doi:10.7554/eLife.71379)
Supplement: Figure 5—source data 1. [file elife-71379-fig5-data1.xlsx]

## Sheet: Feuil1
Astrocytes (purified microvessels) (a.u.)
Protein name	Stage	WT						Mlc1 KO						Two-tailed Mann-Whitney test		Corresponding Figure
		Min	1st quartile	Median	3rd quartile	Max	N	Min	1st quartile	Median	3rd quartile	Max	N	P-value	Significance
Aquaporin 4	P60	0.48	0.52	1.08	1.44	1.71	5	0.26	0.27	0.28	0.46	0.47	5	0.0079	**	5A
Neurofilament (whole brain) (a.u.)
Protein name	Stage	WT						Mlc1 KO						Two-tailed Mann-Whitney test		Corresponding Figure
		Min	1st quartile	Median	3rd quartile	Max	N	Min	1st quartile	Median	3rd quartile	Max	N	P-value	Significance
Neurofilament-M	P60	0.74	0.81	0.92	1.23	1.27	5	0.59	0.75	1.065	1.25	1.37	5	0.9999	ns	5B
Neurofilament (purified microvessels) (a.u.)
Protein name	Stage	WT						Mlc1 KO						Two-tailed Mann-Whitney test		Corresponding Figure
		Min	1st quartile	Median	3rd quartile	Max	N	Min	1st quartile	Median	3rd quartile	Max	N	P-value	Significance
Neurofilament-M	P60	0.55	0.67	0.81	1.43	1.86	5	0.05	0.07	0.11	0.23	0.23	5	0.0079	**	5B
Immunofluorescence
		WT						Mlc1 KO						Two-tailed Mann-Whitney test		Corresponding Figure
		Min	1st quartile	Median	3rd quartile	Max	N	Min	1st quartile	Median	3rd quartile	Max	N	P-value	Significance
Aquaporin 4	Aquaporin 4 area/Isolectin B4 area	20.22	33.37	37.97	42.5	52.96	22	6.878	15.16	22.96	26.48	31.51	17	<0,0001	***	5C, D
Neurofilament-M	Neurofilament-M area/Isolectin B4 area	1.639	2.546	4.118	7.556	9.748	16	0.1695	0.4196	0.7529	2.093	2.843	15	<0,0001	***
