# Supplementary material for: Megalencephalic leukoencephalopathy with subcortical cysts is a developmental disorder of the gliovascular unit
Source: eLife. 2021 Nov 1;10:e71379. doi: 10.7554/eLife.71379 (PMC8598235; doi:10.7554/eLife.71379)
Supplement: Figure 6—source data 1. [file elife-71379-fig6-data1.xlsx]

## Sheet: Feuil1
Sholl analysis (a.u.)
Stage	Distance to the soma (mm)	WT						Mlc1 KO						Bonferroni's multiple comparaison		2-way-Anova		Corresponding Figure
		Min	1st quartile	Median	3rd quartile	Max	N	Min	1st quartile	Median	3rd quartile	Max	N	P-value	Signifiance	P-value	Signifiance
P10	10	4	7	9	11	14	49	4	10	12	13	24	53	0.0001	***	0.0001	***	6A, D, F
	15	5	9	9	12	17		7	11	13	16	26		0.0001	***
	20	2	6	8	11	22		5	8	10	14	19		0.0001	***
	25	0	3	6	7	18		0	3	5	9	16		0.9999	ns
	30	0	1	3	4	9		0	1	2	4	7		0.9999	ns
	35	0	0	0	2	6		0	0	0	1	5		0.9999	ns
P15	10	3	6	8	10	20	50	7	11	13	16	21	51	0.0001	***	0.0001	***
	15	3	7	10	12.75	24		4	10.5	15	19	23		0.0001	***
	20	2	5.25	8.5	11	17		6	9.5	11	16	21		0.0001	***
	25	0	3	5	8	14		2	6	7	10	18		0.0005	***
	30	0	1	2	4	12		0	2	4	7	10		0.3544	ns
	35	0	0	0	2	6		0	0	1	2	7		0.9999	ns
P60	10	7	11	14	17	27	48	6	10	12	14	21	44	0.657	ns	0.0001	***
	15	6	13	17.5	21	27		7	10.75	14	16	22		0.0003	***
	20	7	11.75	15.5	19	26		6	9.75	13	17	30		0.303	*
	25	1	5.75	10	13.25	23		2	5.75	7	9	13		0.0011	**
	30	0	1.75	5	8	16		0	2	3	5	9		0.3927	ns
	35	0	0	1	3	8		0	0	0.5	2	6		0.9999	ns
Astrocytic polarity towards the stratum radiatum (a.u.)
Stage	WT						One sample wilcoxon test		Mlc1 KO						One sample wilcoxon test		Two-tailed Mann-Whitney test		Corresponding Figure
	Min	1st quartile	Median	3rd quartile	Max	N	P-value	Signifiance	Min	1st quartile	Median	3rd quartile	Max	N	P-value	Signifiance	P-value	Significance
P60	0.63	1.04583	1.2	1.615	3.18	47	0.0001	***	0.47	1.07	1.19	1.56	2.45	52	0.0001	***	0.8904	ns	6C
Astrocytic polarity towards vessels (a.u.)
Stage	WT						One sample wilcoxon test		Mlc1 KO						One sample wilcoxon test		Two-tailed Mann-Whitney test		Corresponding Figure
	Min	1st quartile	Median	3rd quartile	Max	N	P-value	Signifiance	Min	1st quartile	Median	3rd quartile	Max	N	P-value	Signifiance	P-value	Significance
P10	0.5	0.848416	1.03333	1.14038	1.6875	26	0.771	ns	0.333333	1	1.19048	1.28175	1.73333	35	0.0072	**	0.0401	*	6B, E, G
P15	0.666667	0.900219	1.10172	1.14439	1.5	46	0.1157	ns	0.615385	1	1.15476	1.35846	1.77778	48	0.0004	***	0.0482	*
P60	0.56	0.88	1.03	1.11	1.59	41	0.8225	ns	0.91	1.13	1.22	1.42	2.29	41	0.0001	***	0.0001	***
