# Supplementary material for: Megalencephalic leukoencephalopathy with subcortical cysts is a developmental disorder of the gliovascular unit
Source: eLife. 2021 Nov 1;10:e71379. doi: 10.7554/eLife.71379 (PMC8598235; doi:10.7554/eLife.71379)
Supplement: Figure 7—figure supplement 2—source data 1. [file elife-71379-fig7-figsupp2-data1.xlsx]

## Sheet: Feuil1
Pericascular astrocytic process' swelling
Age	zone		WT						Mlc1 KO						Two-tailed Mann-Whitney test		Corresponding Figure
			Min	1st quartile	Median	3rd quartile	Max	N (mice)	Min	1st quartile	Median	3rd quartile	Max	N (mice)	P-value	Significance
1 year	Cortex	swelling 0	65.1	72.65	80.2	84.15	88.1	3	15	20.25	25.5	27.75	30	3	0.0500	*	Fig7 supplement 2
		swelling 1	9.9	13.85	17.8	26.35	34.9	3	57.4	59.95	62.5	63.75	65	3	0.0500	*
		swelling 2	0	1	2	2	2	3	7.5	12.25	17	18.5	20	3	0.0500	*
