# Supplementary material for: Megalencephalic leukoencephalopathy with subcortical cysts is a developmental disorder of the gliovascular unit
Source: eLife. 2021 Nov 1;10:e71379. doi: 10.7554/eLife.71379 (PMC8598235; doi:10.7554/eLife.71379)
Supplement: Figure 7—source data 1. [file elife-71379-fig7-data1.xlsx]

## Sheet: Feuil1
Percentage of capillaries and venules with contacting neuronal processes :
Age	zone	WT						Mlc1 KO						Two-tailed Student’s T test		Corresponding Figure
		Min	1st quartile	Median	3rd quartile	Max	N (mice)	Min	1st quartile	Median	3rd quartile	Max	N (mice)	P-value	Significance
P60	Cortex	5.95238	7.37045	8.14692	9.15053	11.25	4	26.3636	43.6599	51.4568	54.987	59.4828	4	0.0018	***	7F
	Hippocampus	4.61538	4.78288	5.54435	6.25	6.25	4	19.3182	21.0227	25.7955	30.6818	32.7273	4	0.0008	***
Pericascular astrocytic process' swelling
Age	zone		WT						Mlc1 KO						Two-tailed Mann-Whitney test		Corresponding Figure
			Min	1st quartile	Median	3rd quartile	Max	N (mice)	Min	1st quartile	Median	3rd quartile	Max	N (mice)	P-value	Significance
P60	Cortex	swelling 0	56.3	74	81.15	83.75	87.8	4	45.8	53	68.4	81.725	82.7	4	0.2429	ns	7G
		swelling 1	12.2	15.425	18.3	25.7	42.5	4	17.3	18.275	31.2	45.925	52.3	4	0.1714	ns
		swelling 2	0	0	0.55	1.125	1.2	4	0	0	0.45	1.175	2	4	0.5	ns
	Hippocampus	swelling 0	65.6	67.85	71.7	78.35	89	4	51.9	55.725	64.6	74.3	80.6	4	0.2429	ns
		swelling 1	11	21.65	28.3	32	33.8	4	18.5	25.475	32.65	40.15	48.1	4	0.2429	ns
		swelling 2	0	0	0	0.15	0.6	4	0	0	0.4	1.975	5.5	4	0.2143	ns
Glial perivscular coverage (%) :
Age	zone	WT						Mlc1 KO						Two-tailed Mann-Whitney test		Two-tailed Mann-Whitney test			Corresponding Figure
		Min	1st quartile	Median	3rd quartile	Max	N (mice)	Min	1st quartile	Median	3rd quartile	Max	N (mice)	P-value	Significance	Groups	Significance	Significance
P5	Cortex	41.0357	41.3811	41.7265	50.1348	58.543	3	37.6723	39.9099	45.5873	54.5276	66.5537	4	0.8959	ns	WT P5/WT 10	0.0001	***	7H
P10		94.2641	94.8344	95.4047	96.2468	97.0889	3	84.5261	85.8529	87.1796	88.4874	89.7952	3	0.0001	***	WT P10/WT P15	0.0001	***
P15		98.1298	98.732	99.0552	99.2701	99.5476	4	93.1832	93.3967	94.0108	94.9437	96.1134	4	0.0001	***	WT P15/WT P60	0.0001	***
P60		99.9022	99.9078	99.9134	99.9286	99.9438	3	95.9064	96.1883	96.4702	96.6284	96.7865	3	0.0001	***
