# Supplementary material for: Megalencephalic leukoencephalopathy with subcortical cysts is a developmental disorder of the gliovascular unit
Source: eLife. 2021 Nov 1;10:e71379. doi: 10.7554/eLife.71379 (PMC8598235; doi:10.7554/eLife.71379)
Supplement: Figure 8—source data 1. [file elife-71379-fig8-data1.xlsx]

## Sheet: Feuil1
Mean concentration of DOTA-Gd (µmol.mm-3)
Zone	WT						Mlc1 KO						Two-tailed Mann-Whitney test		Corresponding Figure
	Min	1st quartile	Median	3rd quartile	Max	N	Min	1st quartile	Median	3rd quartile	Max	N	P-value	Significance
Cerebellum	0.00426463	0.0267425	0.0288041	0.0483802	0.071296	9	0.025353	0.0293163	0.0466935	0.0793396	0.103101	9	0.1903	ns	8D-G
Cortex	4.25e-05	0.00617709	0.00779869	0.00998234	0.0167197	8	0.00125215	0.00451724	0.00835842	0.00946858	0.0166498	9	0.8148	ns
Midbrain	0.00467012	0.0112242	0.0259375	0.0441905	0.0660304	9	0.00263153	0.00864253	0.00956148	0.0145664	0.0180538	9	0.03147	*
Septal Area	0.00459037	0.0146211	0.0756982	0.128565	0.177079	9	0.00707701	0.010361	0.0117521	0.0196086	0.0321079	9	0.1135	ns
Slope of DOTA-Gd (µmol.mm-3.min)
Zone	WT						Mlc1 KO						Two-tailed Mann-Whitney test		Corresponding Figure
	Min	1st quartile	Median	3rd quartile	Max	N	Min	1st quartile	Median	3rd quartile	Max	N	P-value	Significance
Cerebellum	9.02e-05	0.000282275	0.00053525	0.000608825	0.00139028	9	-0.000516072	-0.000186464	8.27587e-06	0.000106599	0.000305798	9	0.001234	**	8D-G
Cortex	-2.775e-05	1.42688e-05	0.000135137	0.000219587	0.00028975	8	-0.000138483	-7.22353e-05	-6.6282e-05	7.04417e-05	8.97008e-05	9	0.01522	*
Midbrain	8.62e-05	0.000219425	0.000527225	0.000999275	0.00123773	9	-8.34577e-05	5.4652e-05	0.000131258	0.000259322	0.000443129	9	0.01876	*
Septal Area	-0.000398625	-1.735e-05	0.000198775	0.00020955	0.00128195	9	-0.000219646	1.65207e-05	6.00972e-05	0.000161108	0.000625098	9	0.5457	ns
