# Supplementary material for: Megalencephalic leukoencephalopathy with subcortical cysts is a developmental disorder of the gliovascular unit
Source: eLife. 2021 Nov 1;10:e71379. doi: 10.7554/eLife.71379 (PMC8598235; doi:10.7554/eLife.71379)
Supplement: Figure 9—source data 1. [file elife-71379-fig9-data1.xlsx]

## Sheet: Feuil1
MLC1 DAB intentity (a.u)
	Min	1st quartile	Median	3rd quartile	Max	N	Two-tailed Mann-Whitney test			Corresponding Figure
							Groups	P-value	Signifiance
Prenatal	0.488989	0.531109	0.541197	0.623648	0.658297	5	prenatal/0-1 year	0.9999	ns	9
0-1 year	0.472147	0.572094	0.59507	0.610395	0.62238	5	prenatal/3-5 years	0.7302	ns
3-5 years	0.44362	0.479532	0.537296	0.627301	0.748215	4	prenatal/10-13 years	0.1904	ns
10-13 years	0.477811	0.484694	0.516345	0.58251	0.608323	4	0-1 year/3-5 years	0.7302	ns
16-17 years	0.499441	/	/	/	0.608323	2	0-1 year/ 10-13 years	0.2858	ns
							3-5 years/10-13 years	0.3428	ns
