# Supplementary material for: Megalencephalic leukoencephalopathy with subcortical cysts is a developmental disorder of the gliovascular unit
Source: eLife journal article supplement (doi:10.7554/elife.71379), 2021-11-01
Supplement: supp [file elife-71379-supp-v1.zip]

P10

P15

WT

*Mlc1* KO

WT

*Mlc1* KO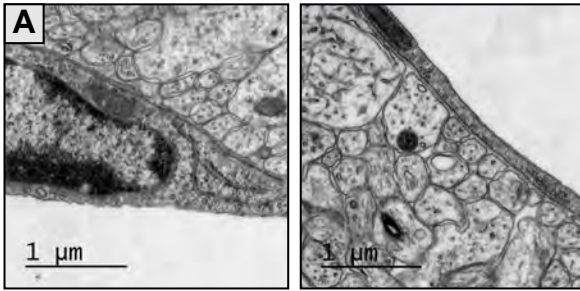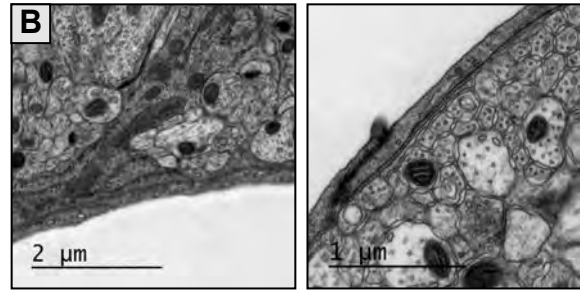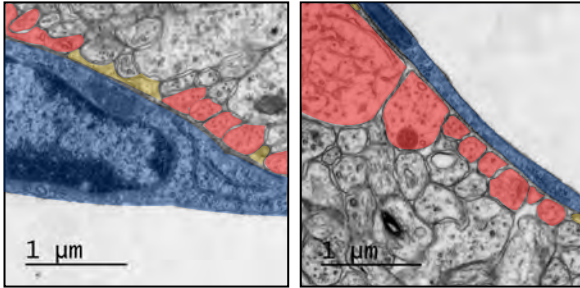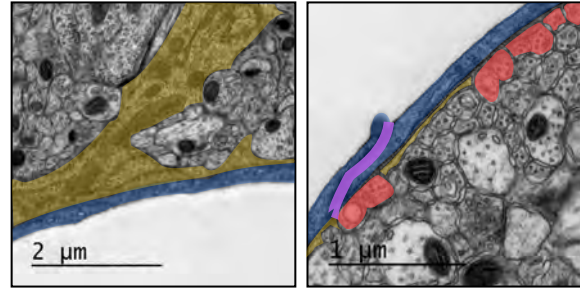

WT (P60)

*Mlc1* KO (P60)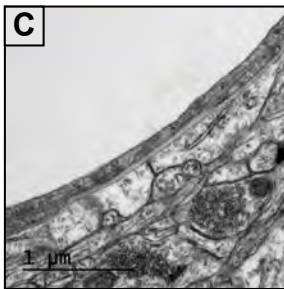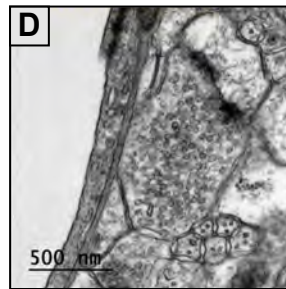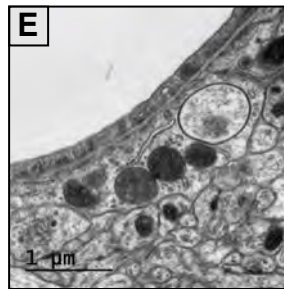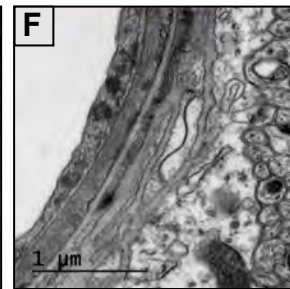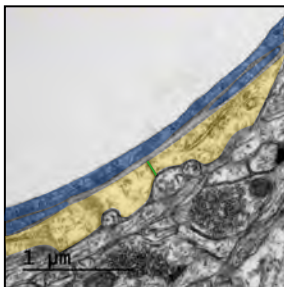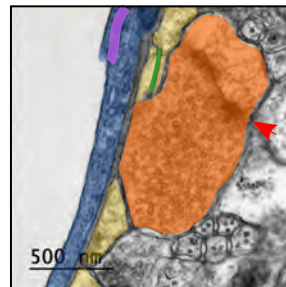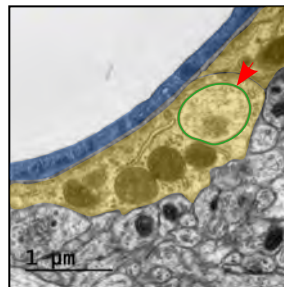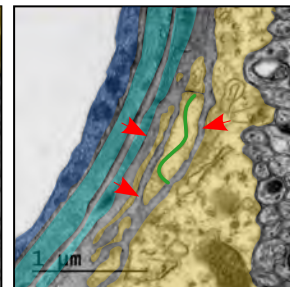

Endothelial cell

Tight junction

Astrocyte

Gap junction

Synapse
