# Supplementary material for: Megalencephalic leukoencephalopathy with subcortical cysts is a developmental disorder of the gliovascular unit
Source: eLife journal article supplement (doi:10.7554/elife.71379), 2021-11-01
Supplement: supp [file elife-71379-supp-v1.zip]

Figure 1

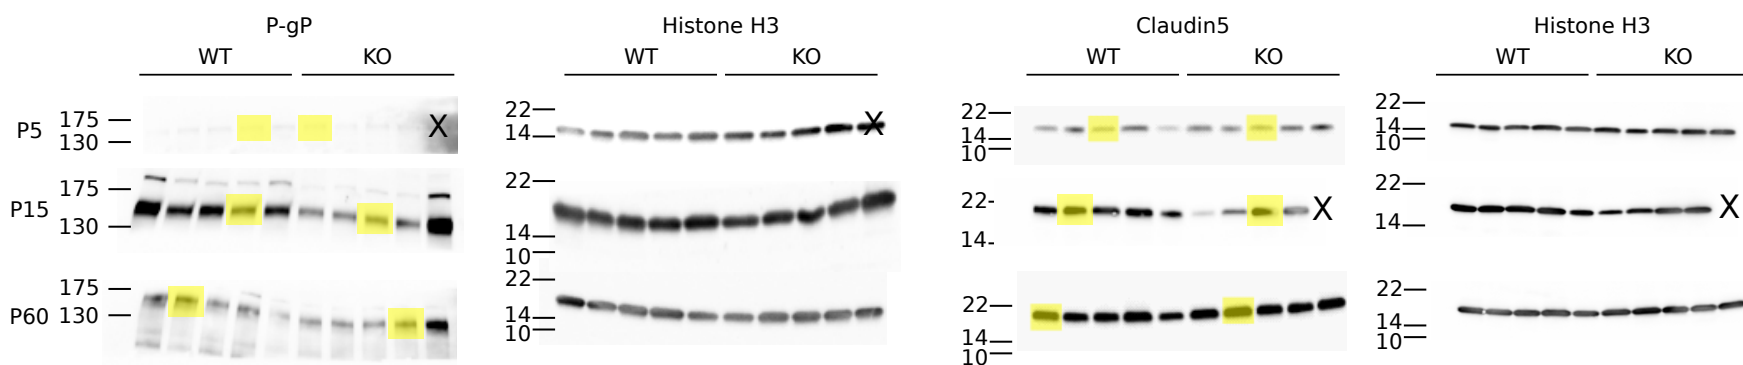

Figure 2

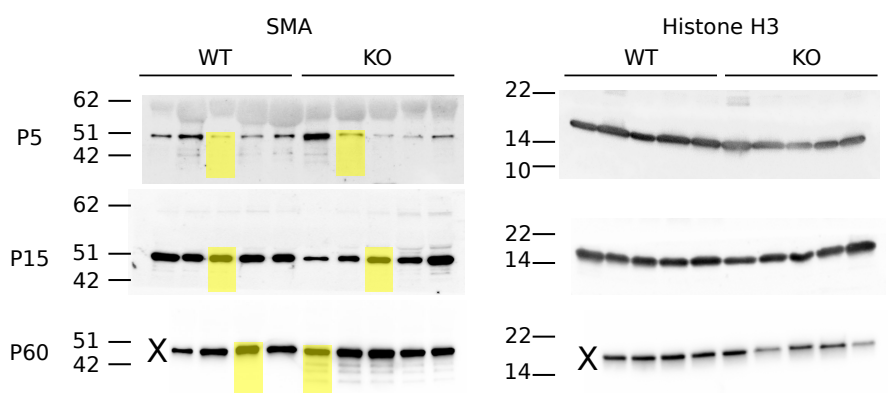

Figure 4

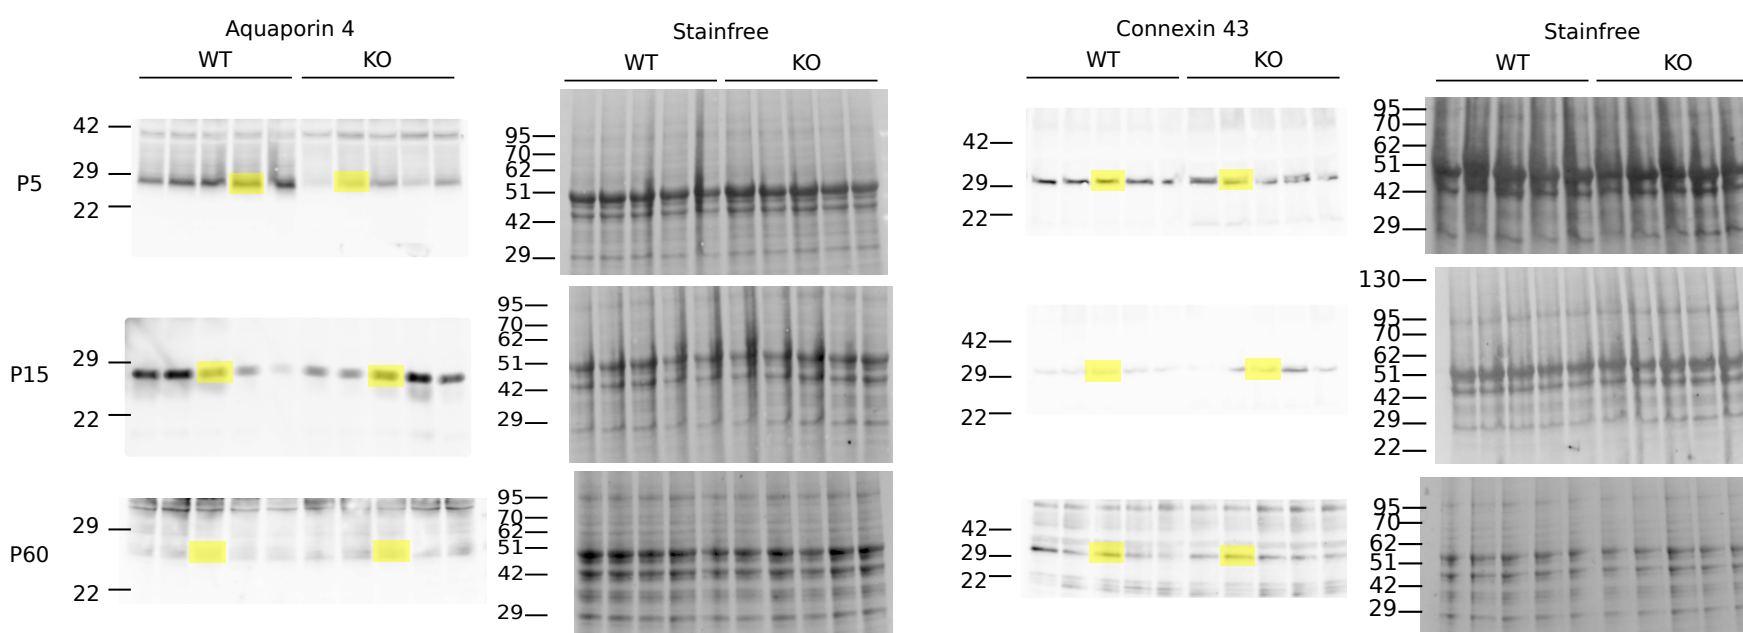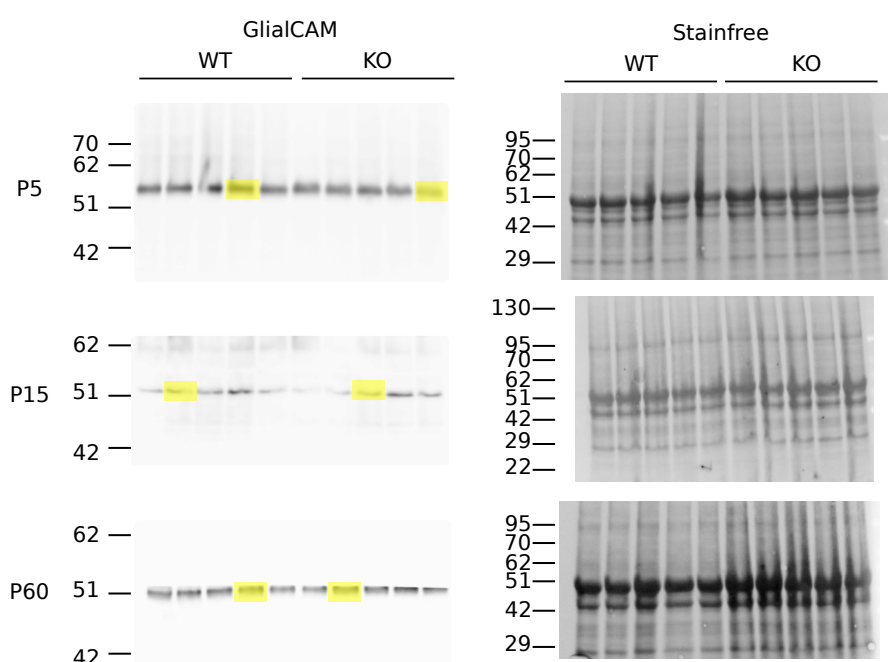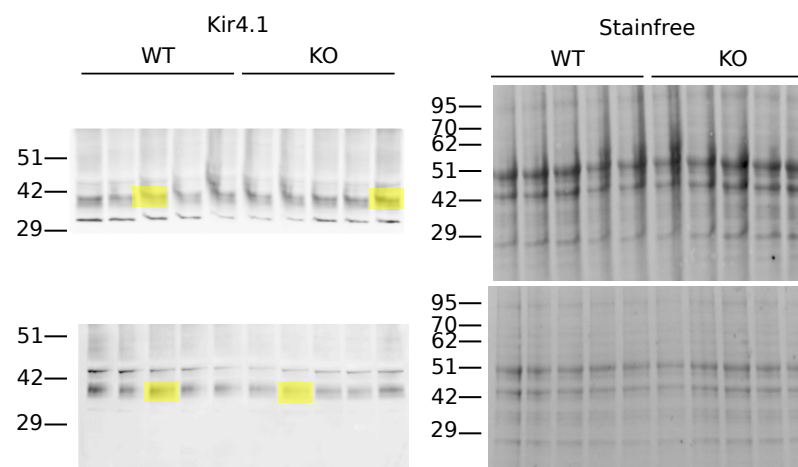

Figure S2

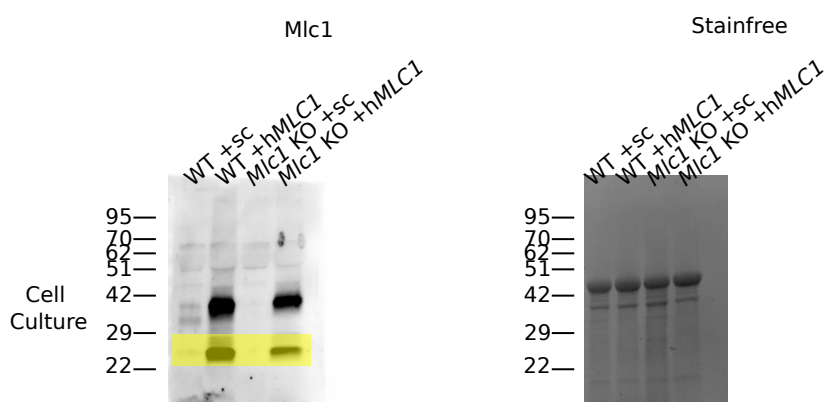

selected-blot area in the figure

X empty (claudin 5 and SMA)  
or excluded (P-gP) from the analysis
