# Supplementary figures and images for: Megalencephalic leukoencephalopathy with subcortical cysts is a developmental disorder of the gliovascular unit
Source: eLife journal article supplement (doi:10.7554/elife.71379), 2021-11-01

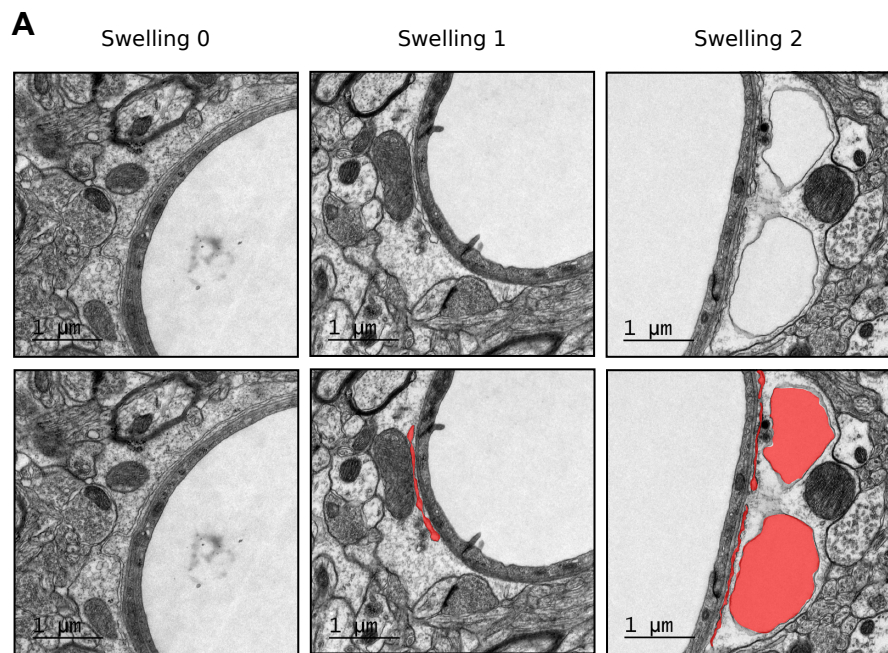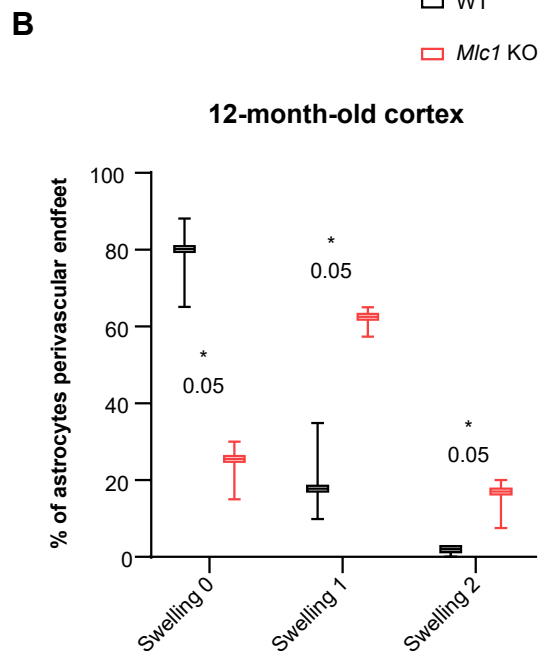

Supplement: supp [file elife-71379-supp-v1.zip]

**A**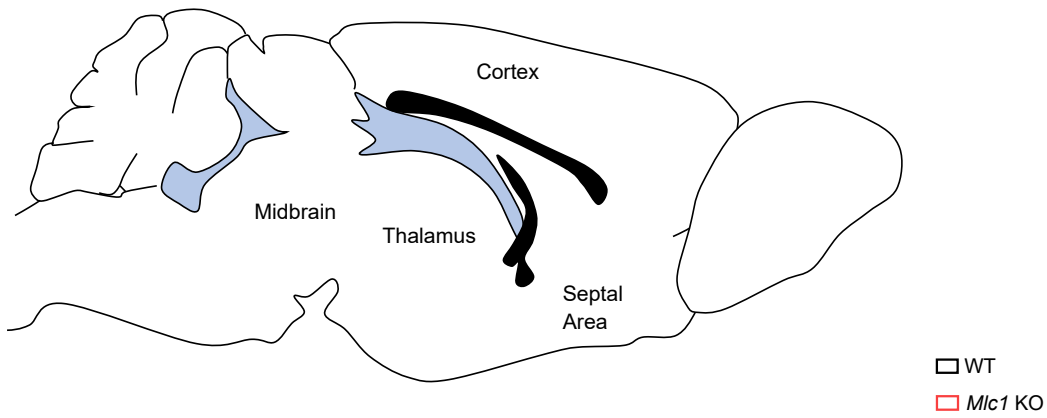**B Anatomical T2**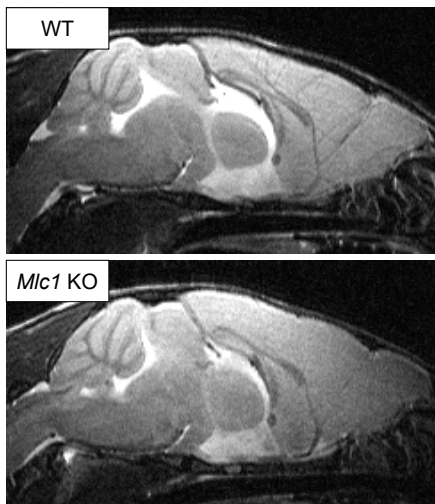**C**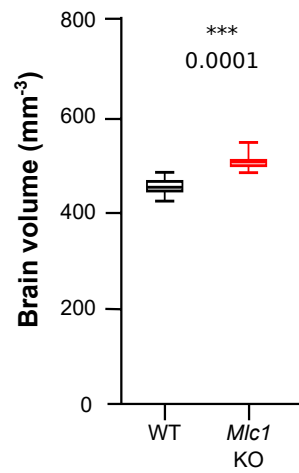**D**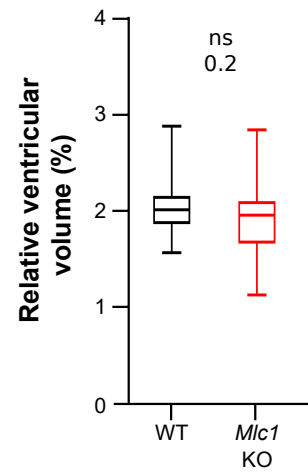**E**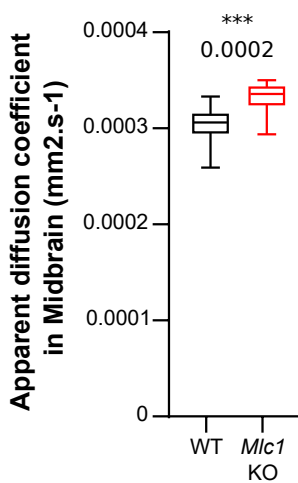**F**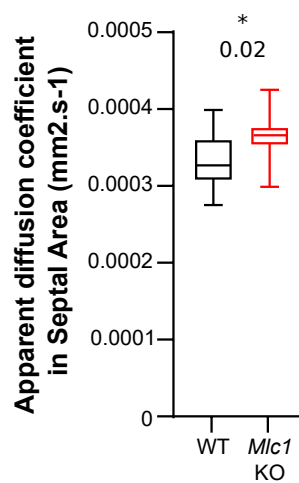**G**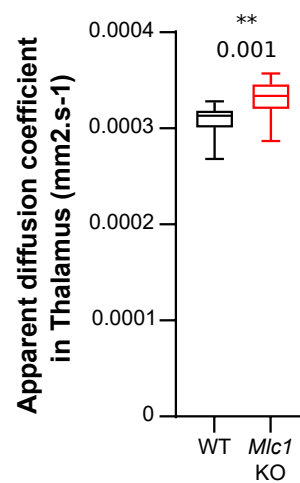

Supplement: supp [file elife-71379-supp-v1.zip]

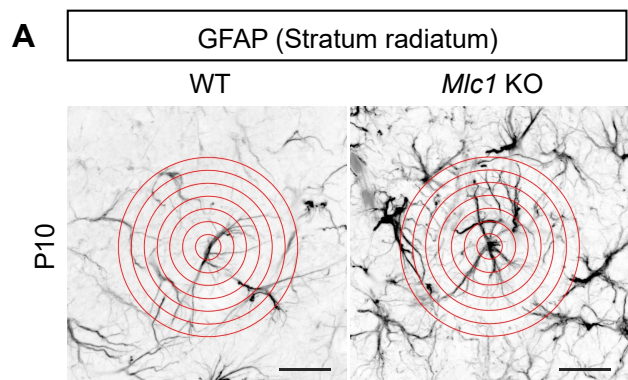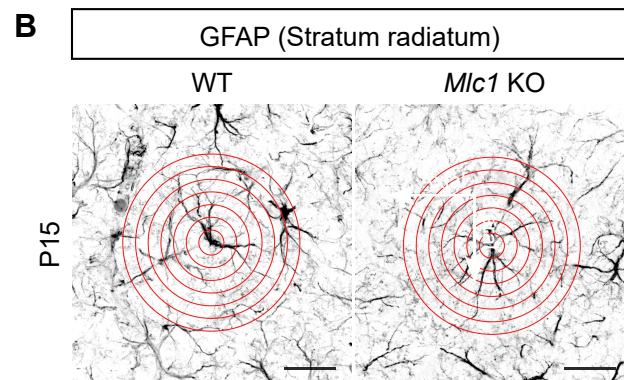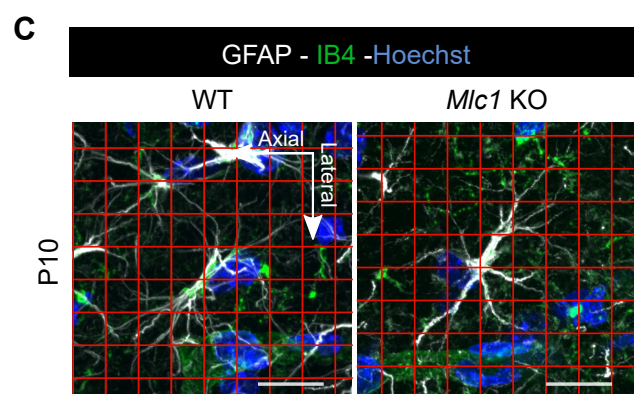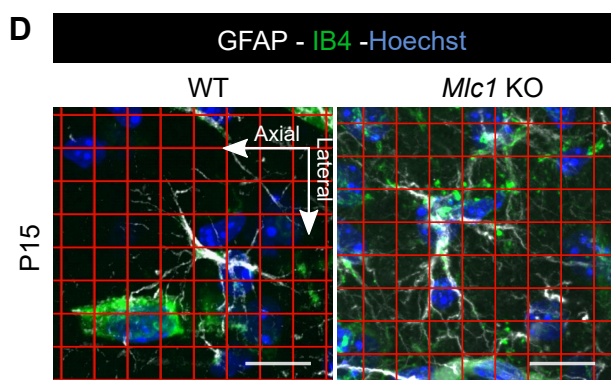

Supplement: supp [file elife-71379-supp-v1.zip]
